# Supplementary material
Source: publisher figshare collection journal article supplement (https://tandf.figshare.com/ndownloader/files/10950125)
Supplement: Supplementary file 1 [file 10950125]

**Supporting Information**

A fluorescent Cd(II) based 2D coordination polymer for highly selective detection of nitroaromatics and Hg2+

YU WU*, RUI WANG, YING-LE LIU, YU-LONG LI, YONG-XIANG HE, YI-WEN LIANG, JIAN‑HUI MAN and ABHINAV KUMAR*


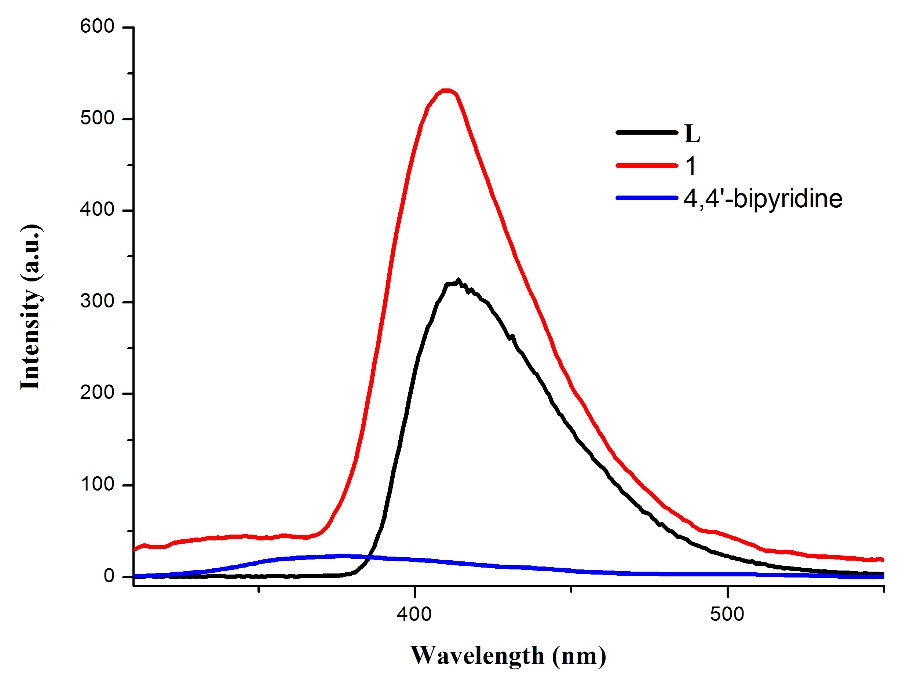


Figure S1. View of luminescent spectra for H2L, 4,4’-bipy and **1** at room temperature.


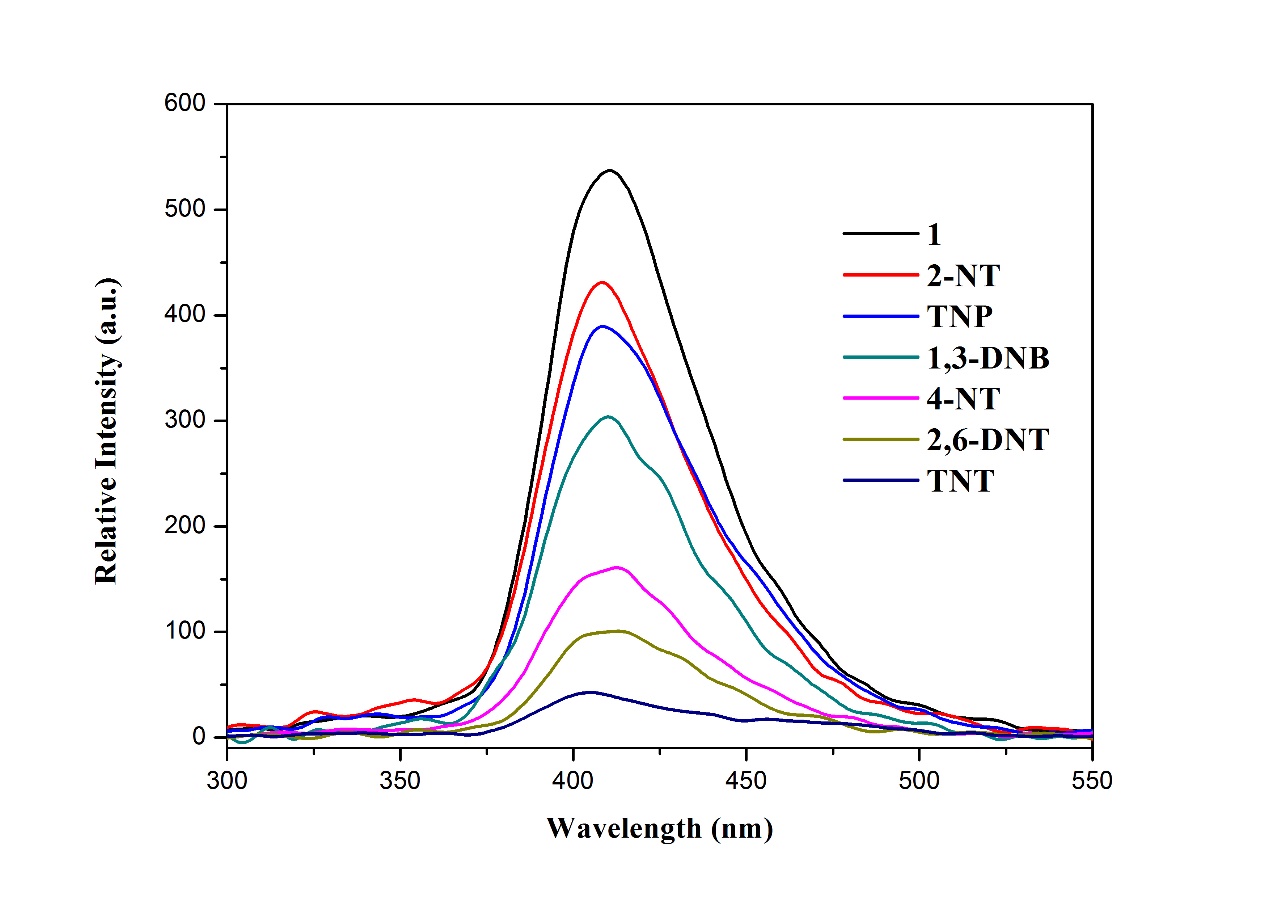


Figure S2. View of luminescent spectra for different NACs in **1** (λex = 290 nm).


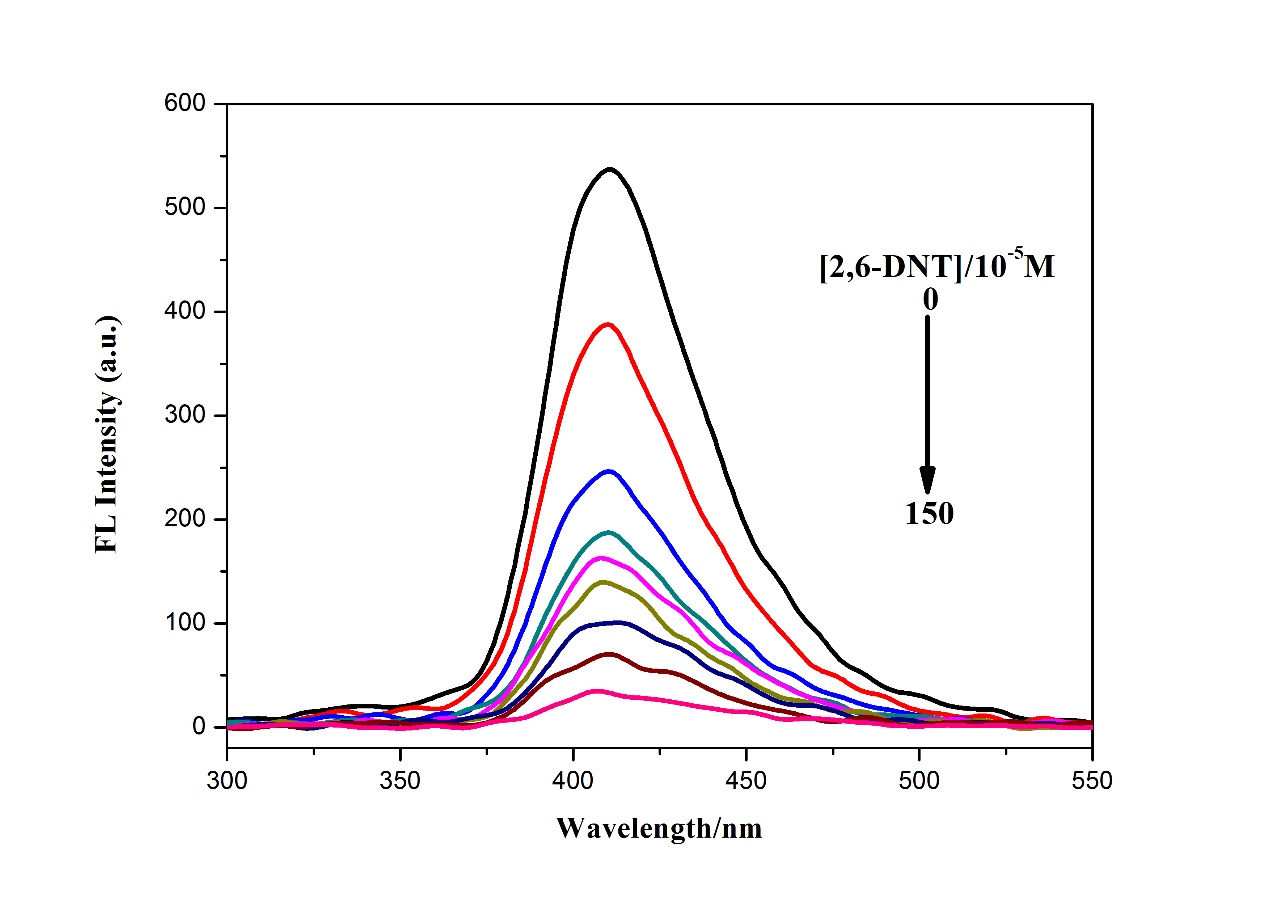


Figure S3. Fluorescence response of **1** to 2,6-DNT in DMF (λex = 290 nm).

*
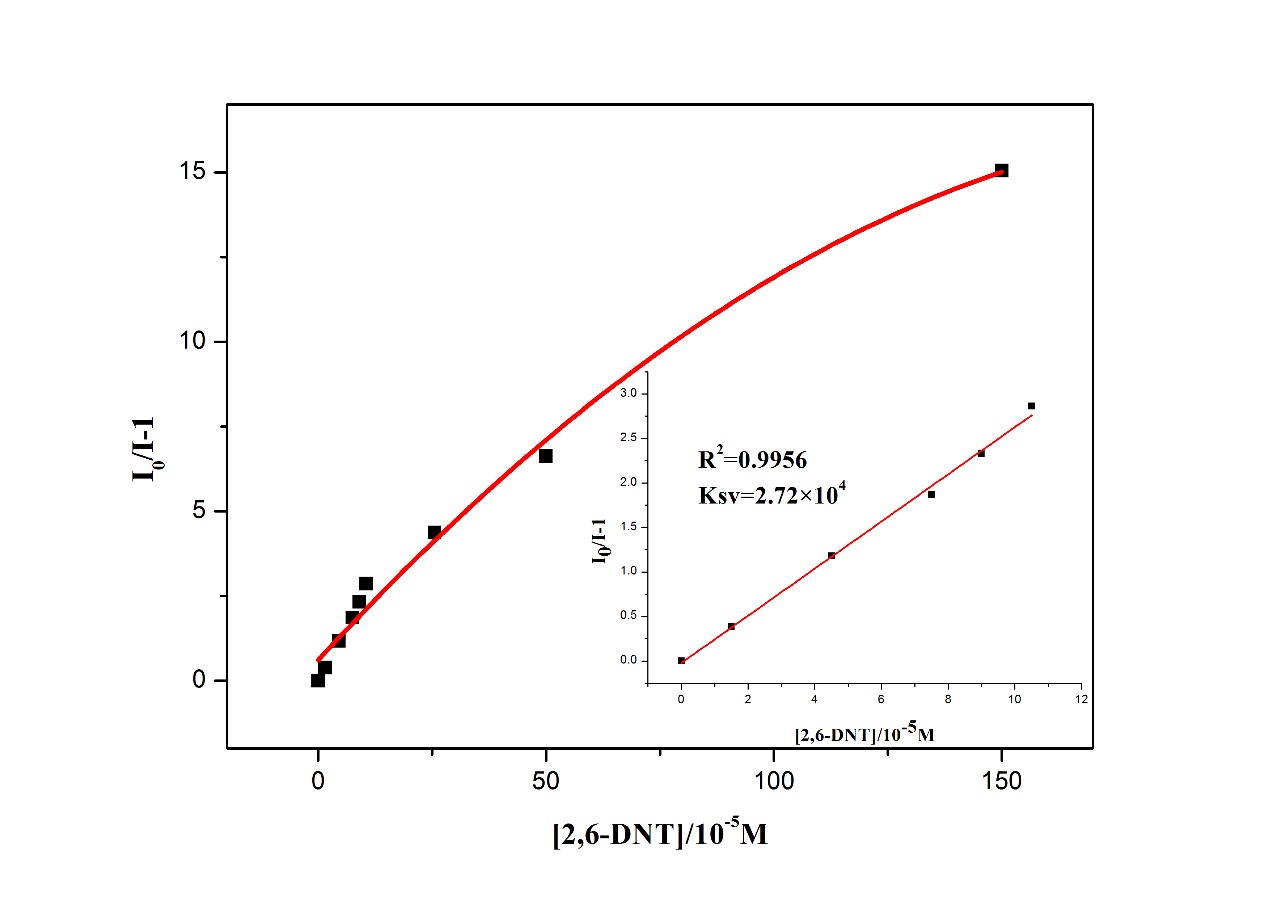
*

Figure S4. Views of Stern–Volmer plots for 2,6-DNT.


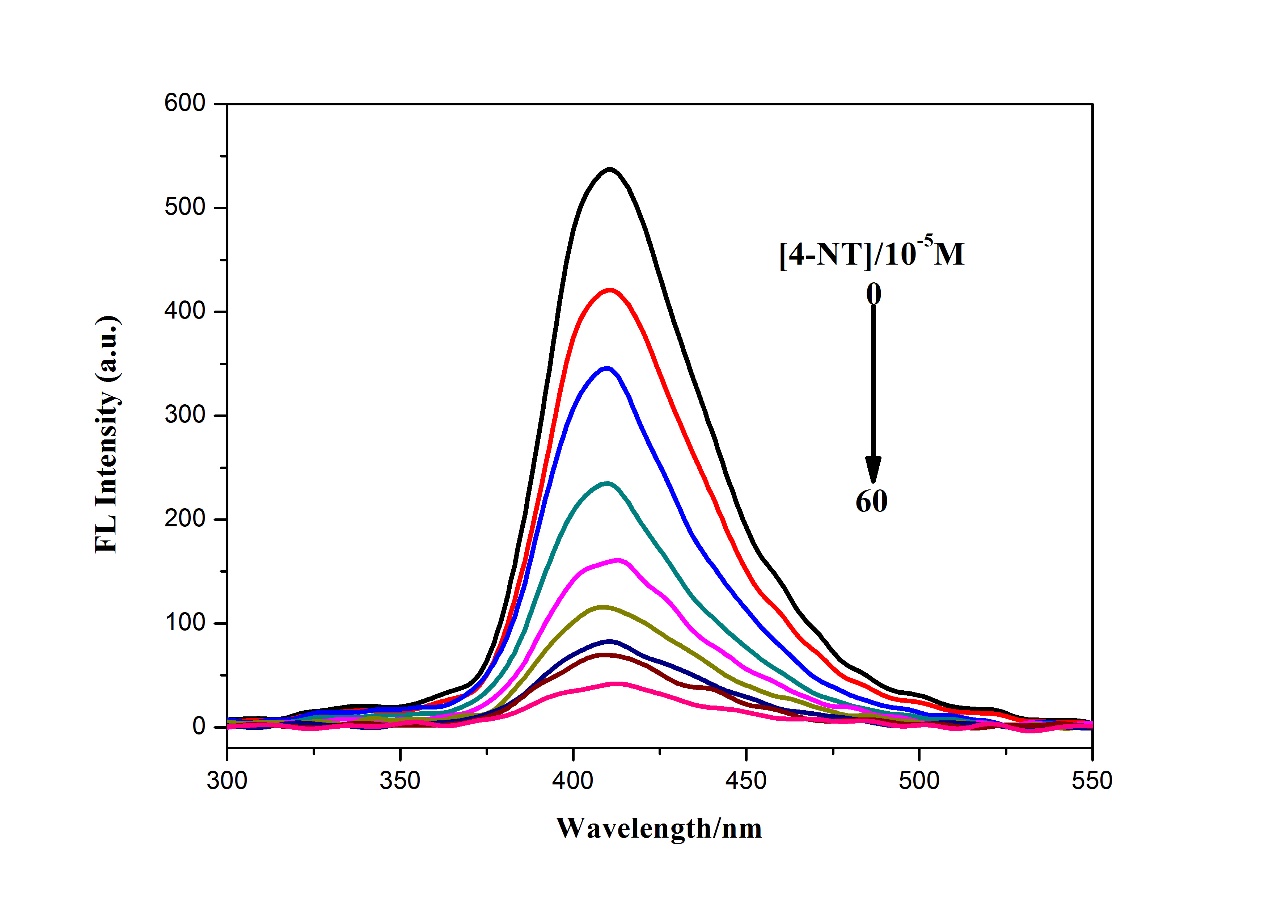


Figure S5. Fluorescence response of **1** to 4-NT in DMF (λex = 290 nm).


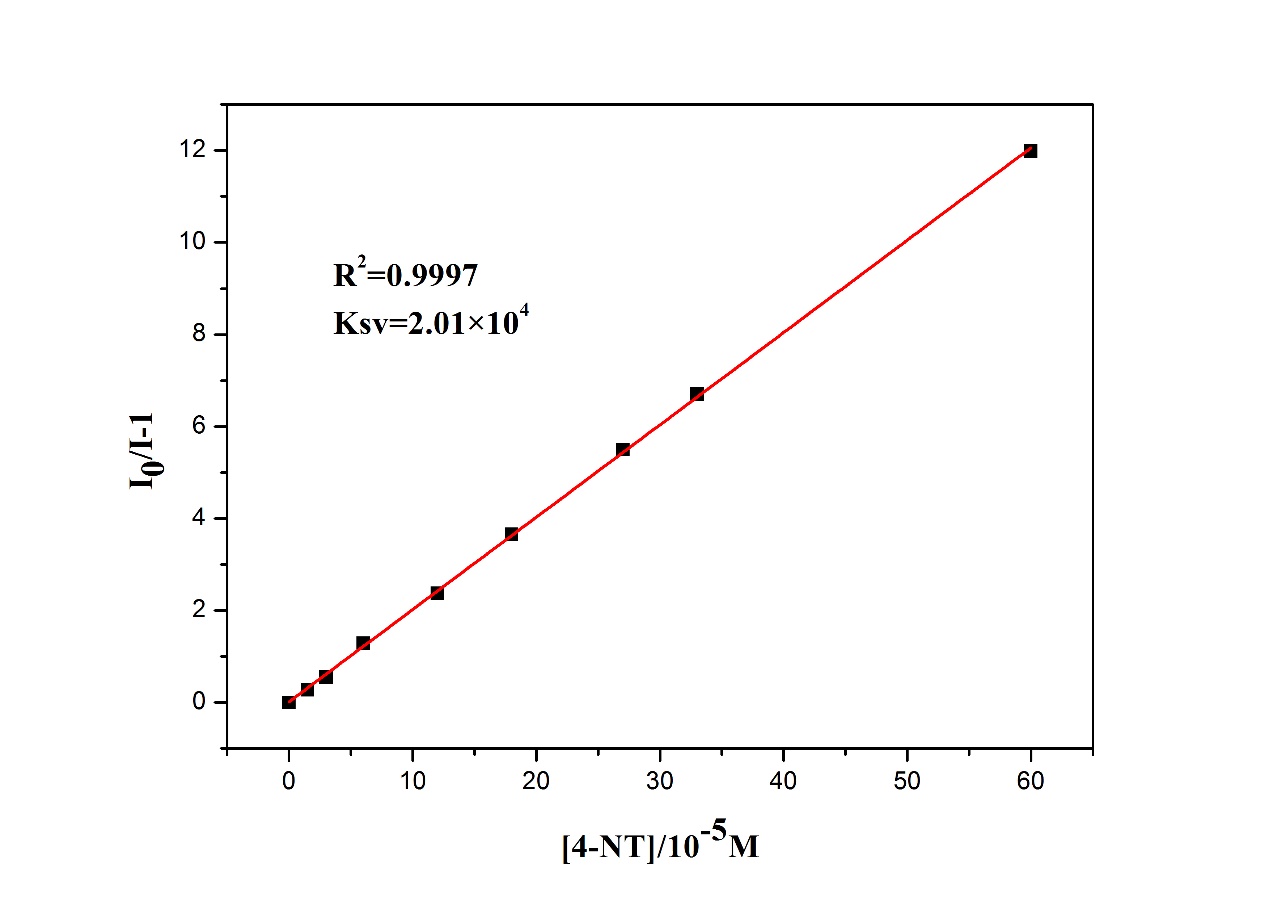


Figure S6. Views of Stern–Volmer plots for 4-NT.


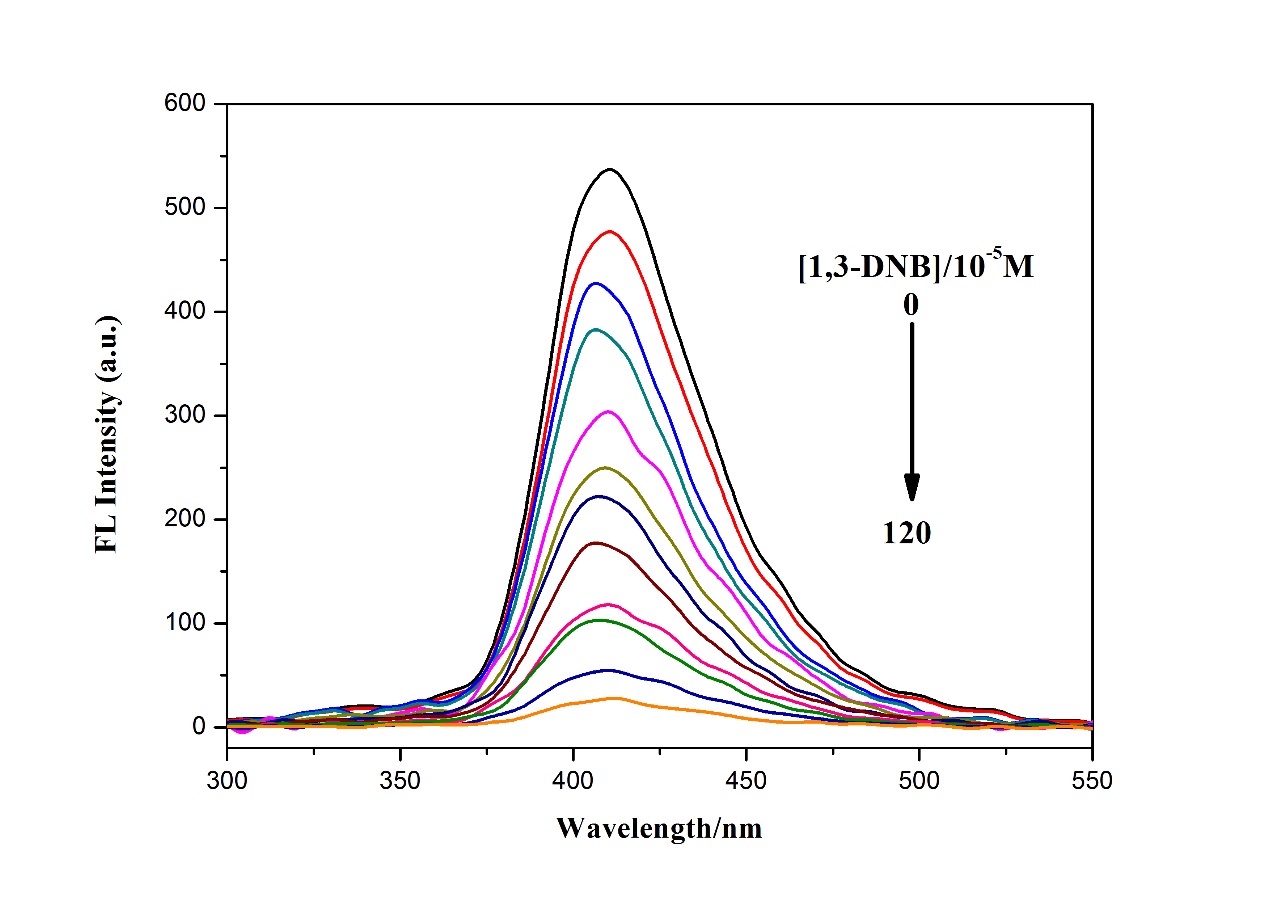


Figure S7. Fluorescence response of **1** to 1,3-DNB in DMF (λex = 290 nm).


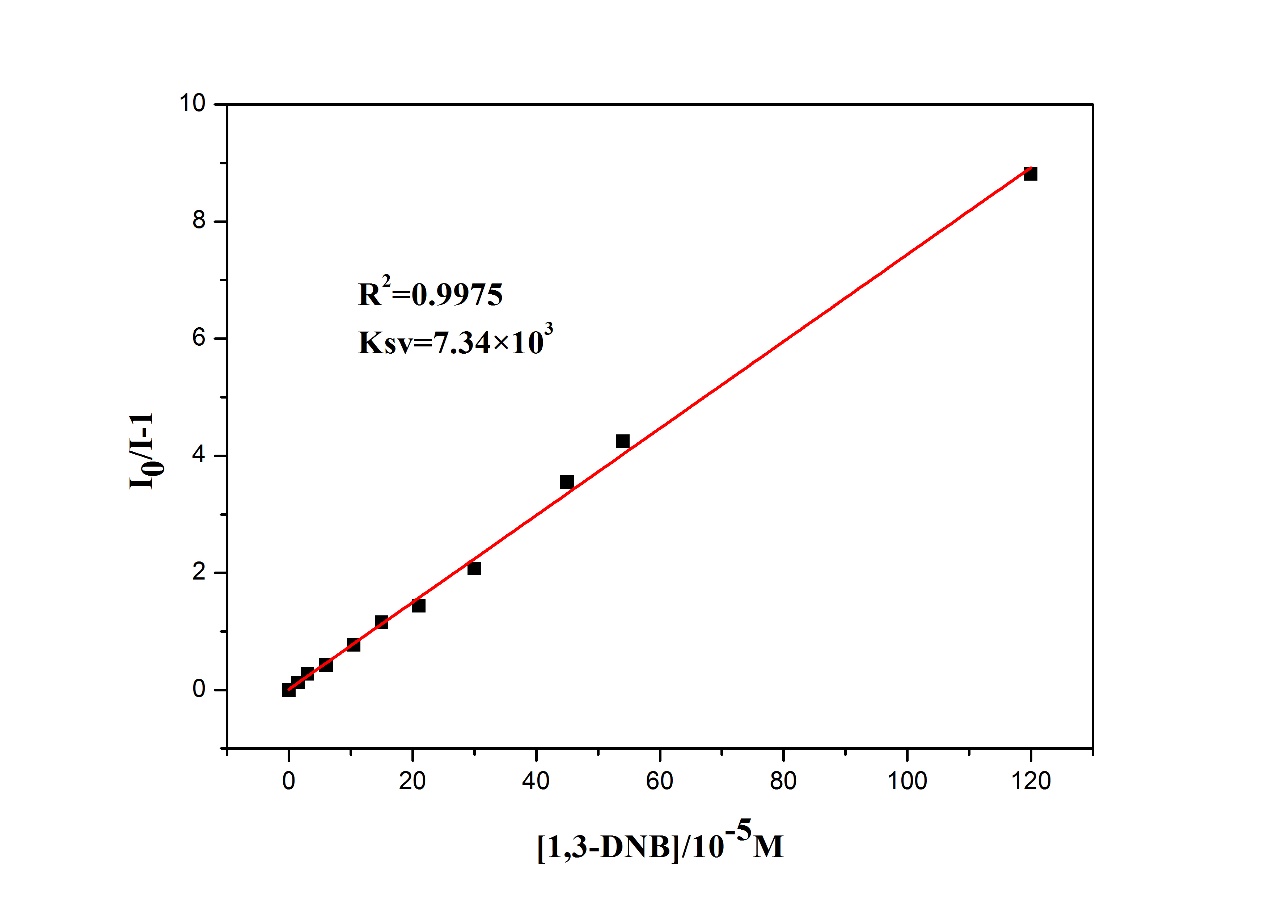


Figure S8. Views of Stern–Volmer plots for 1,3-DNB.


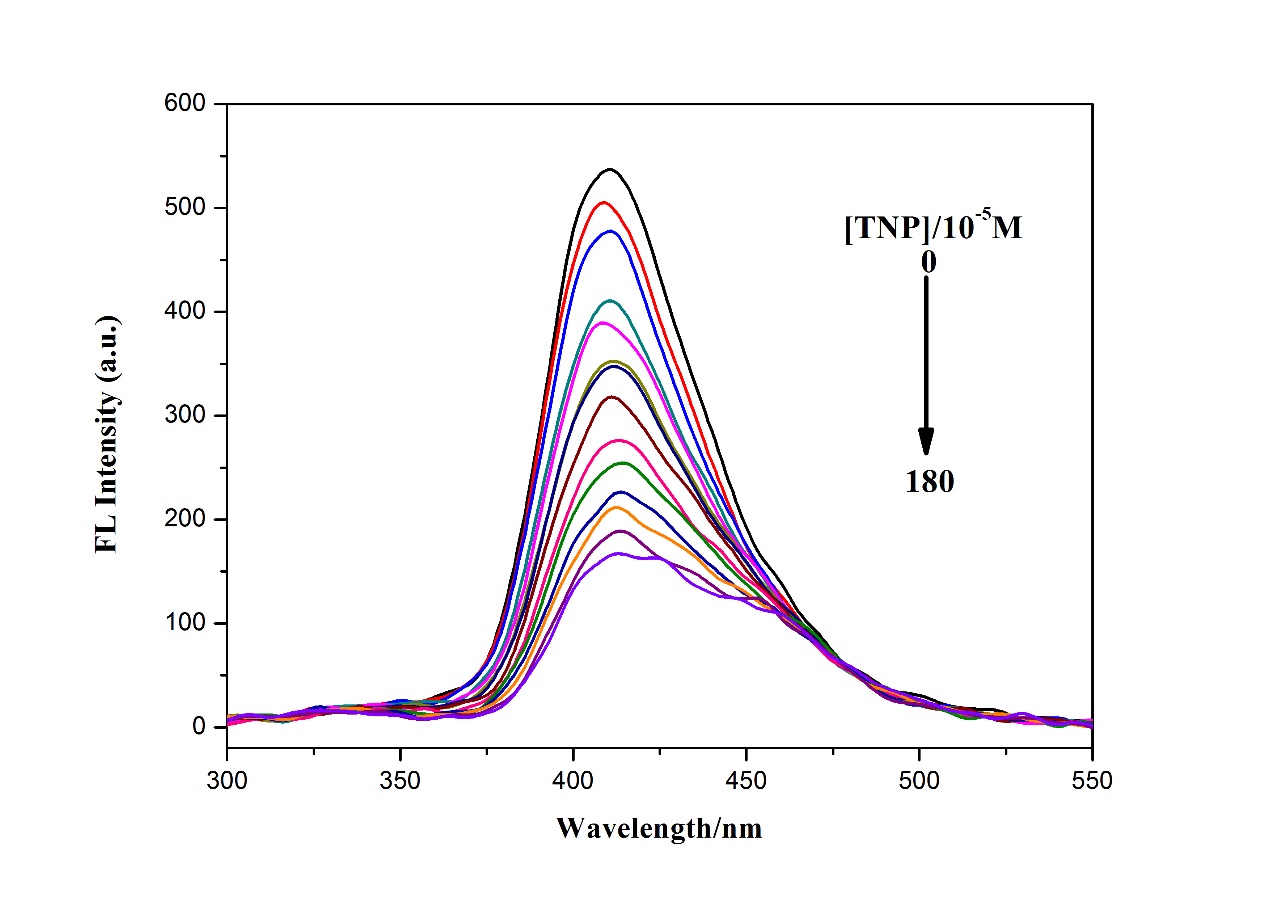


Figure S9. Fluorescence response of **1** to TNP in DMF (λex = 290 nm).


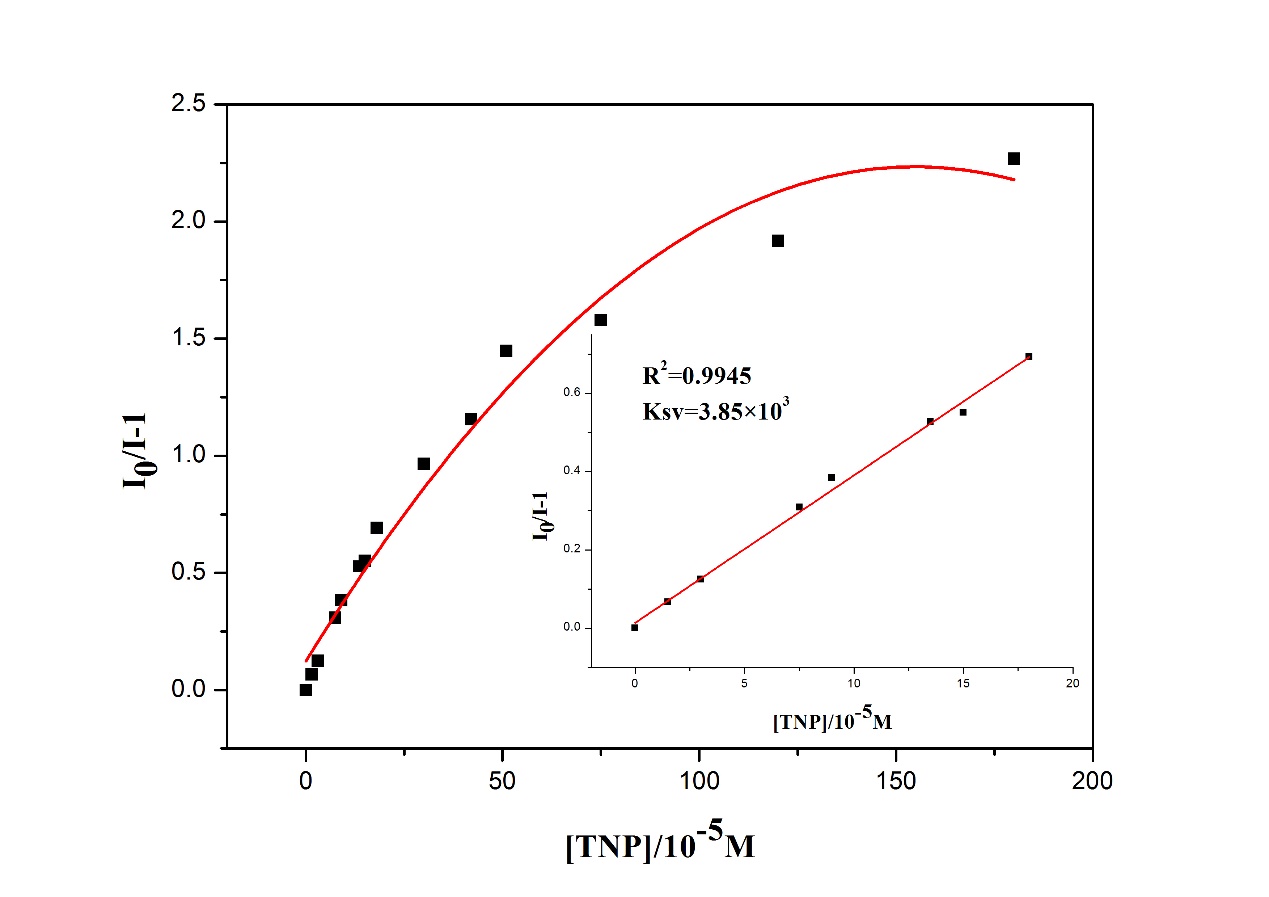


Figure S10. Views of Stern–Volmer plots for TNP.


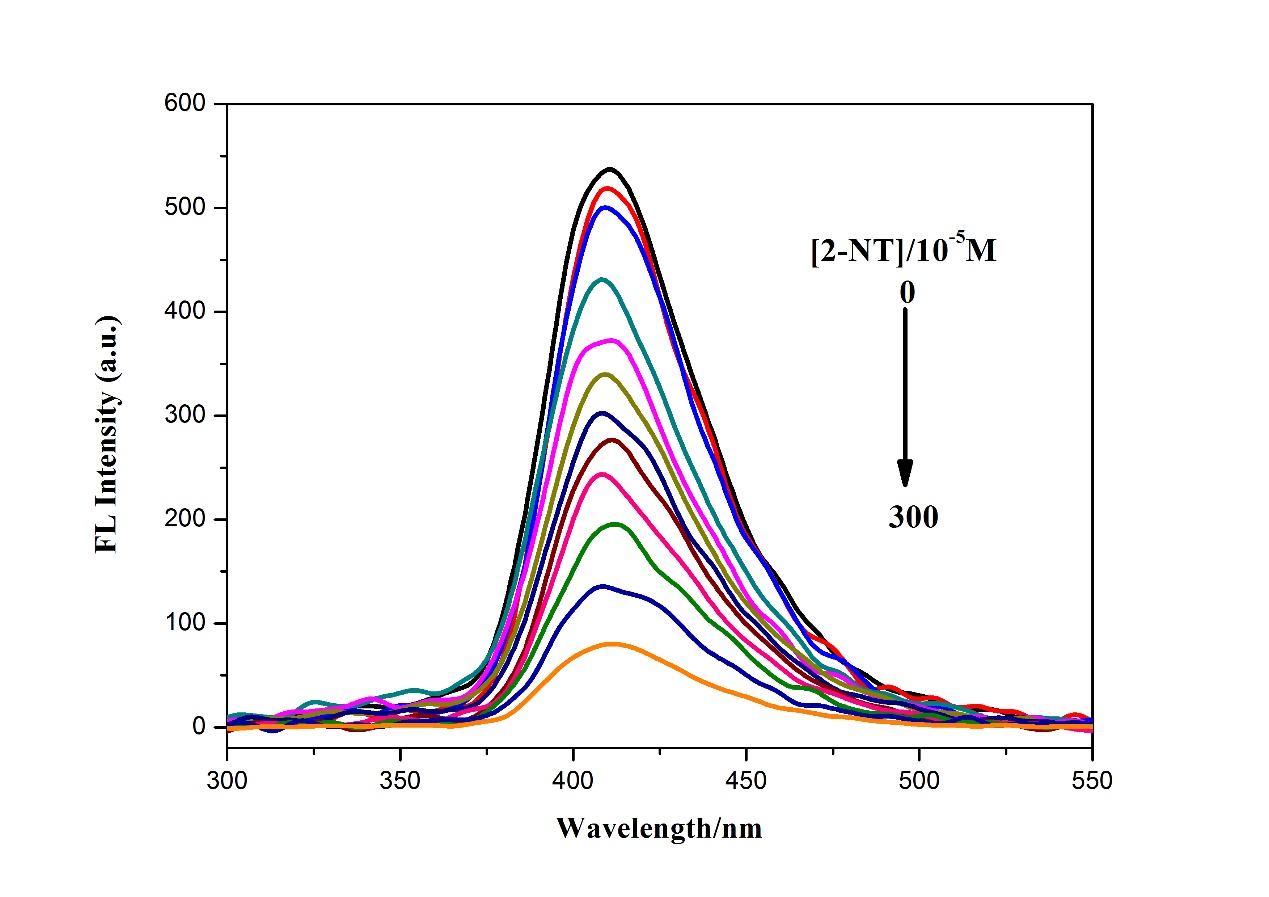


Figure S11. Fluorescence response of **1** to 2-NT in DMF (λex = 290 nm).


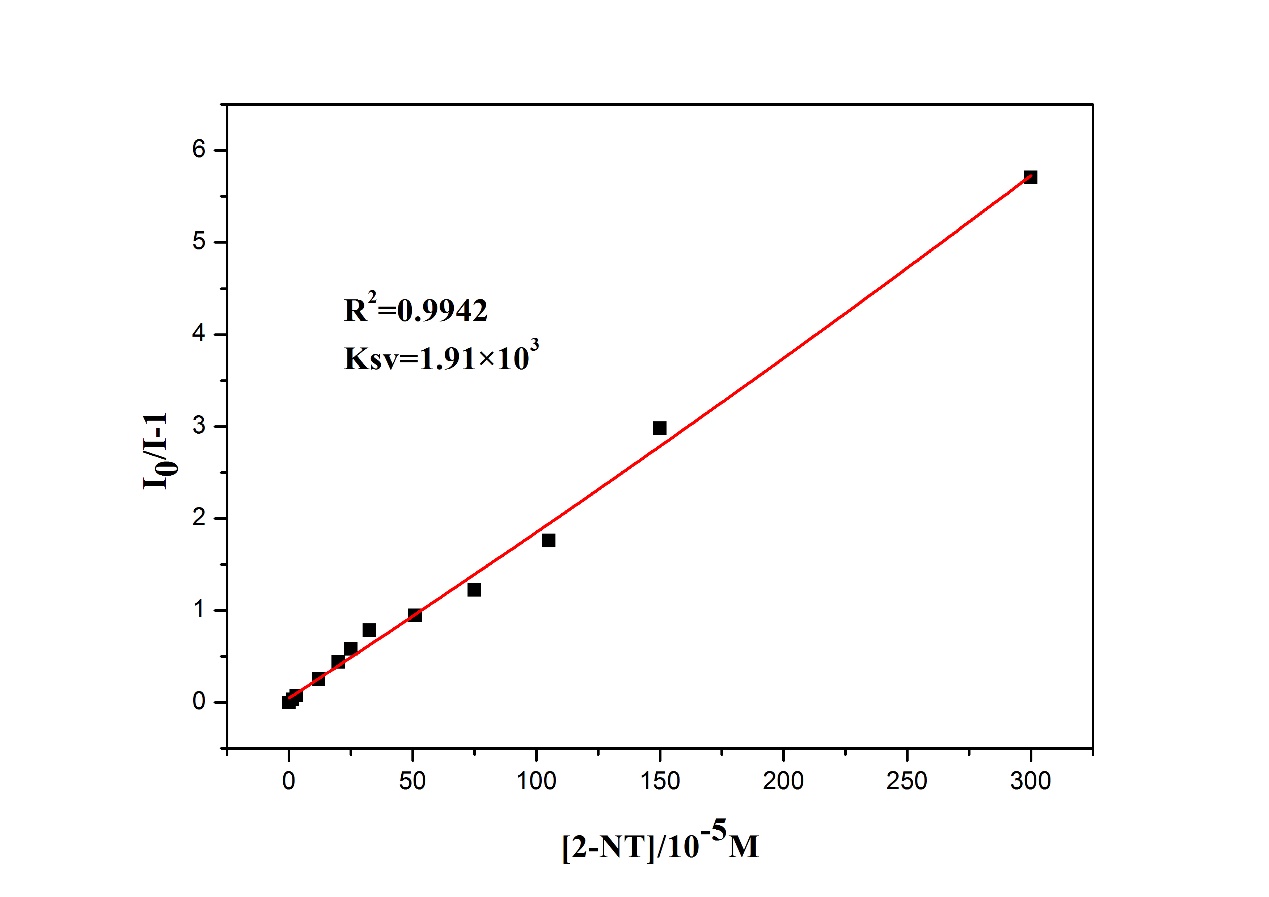


Figure S12. Views of Stern–Volmer plots for 2-NT.


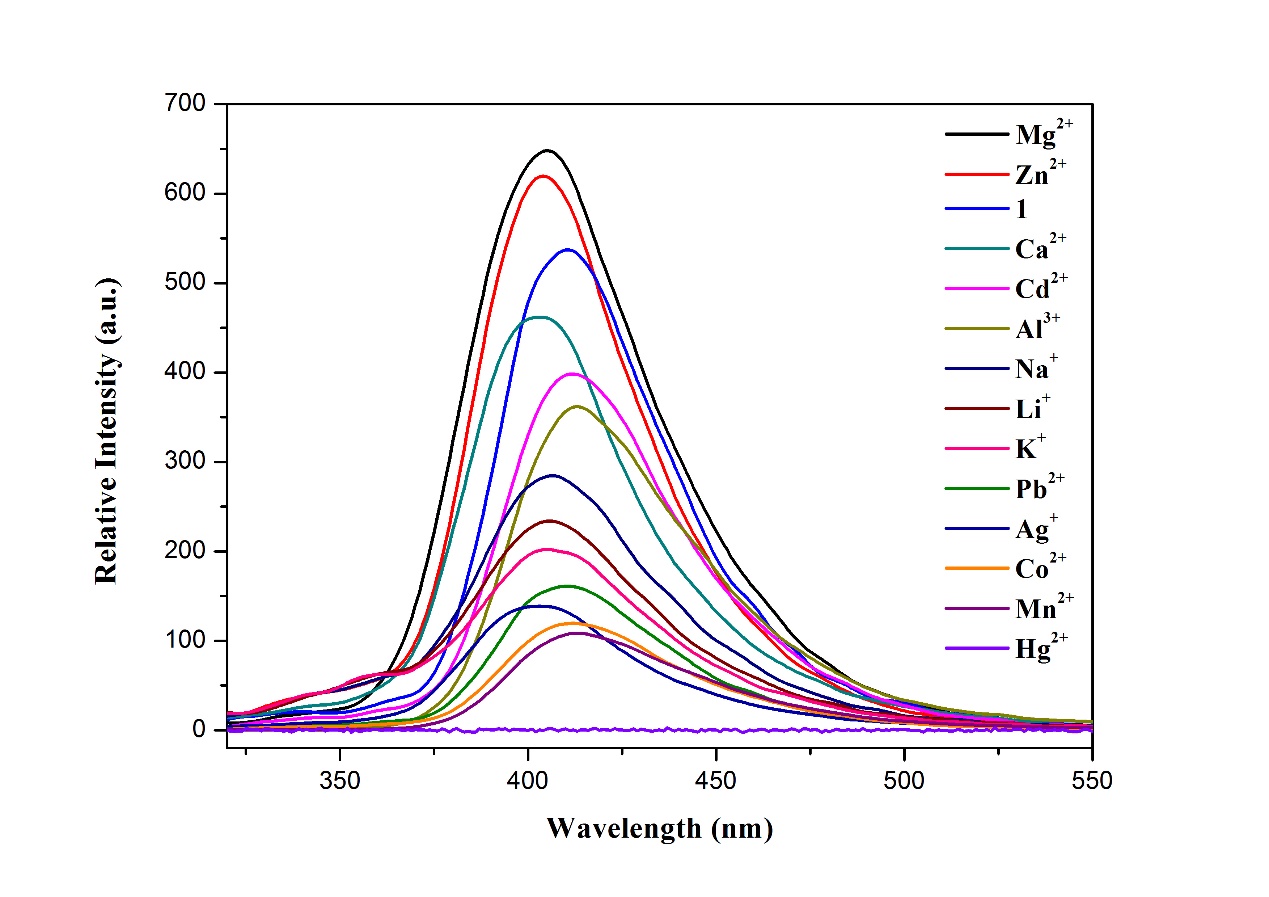


Figure S13. View of luminescent spectra for different metal ions in **1** (λex = 290 nm).

**Thermal analysis**

The thermal stabilities of crystalline samples of **1** were measured under a nitrogen atmosphere. **1** has a two-step weight-loss process. The weight loss of 14.1% (calcd 13.7%) in the first step from 35 to 255 °C corresponds to the removal of one coordinated water and seven free water molecules. The second weight loss occurred in a temperature range from 305 to 575 °C, respectively, corresponding to the decomposition of the organic ligands (obsd: 64.8%; calcd: 65.1%). The remaining residue is attributed to the generation of CdO (obsd 22.8%, calcd 24.3%).


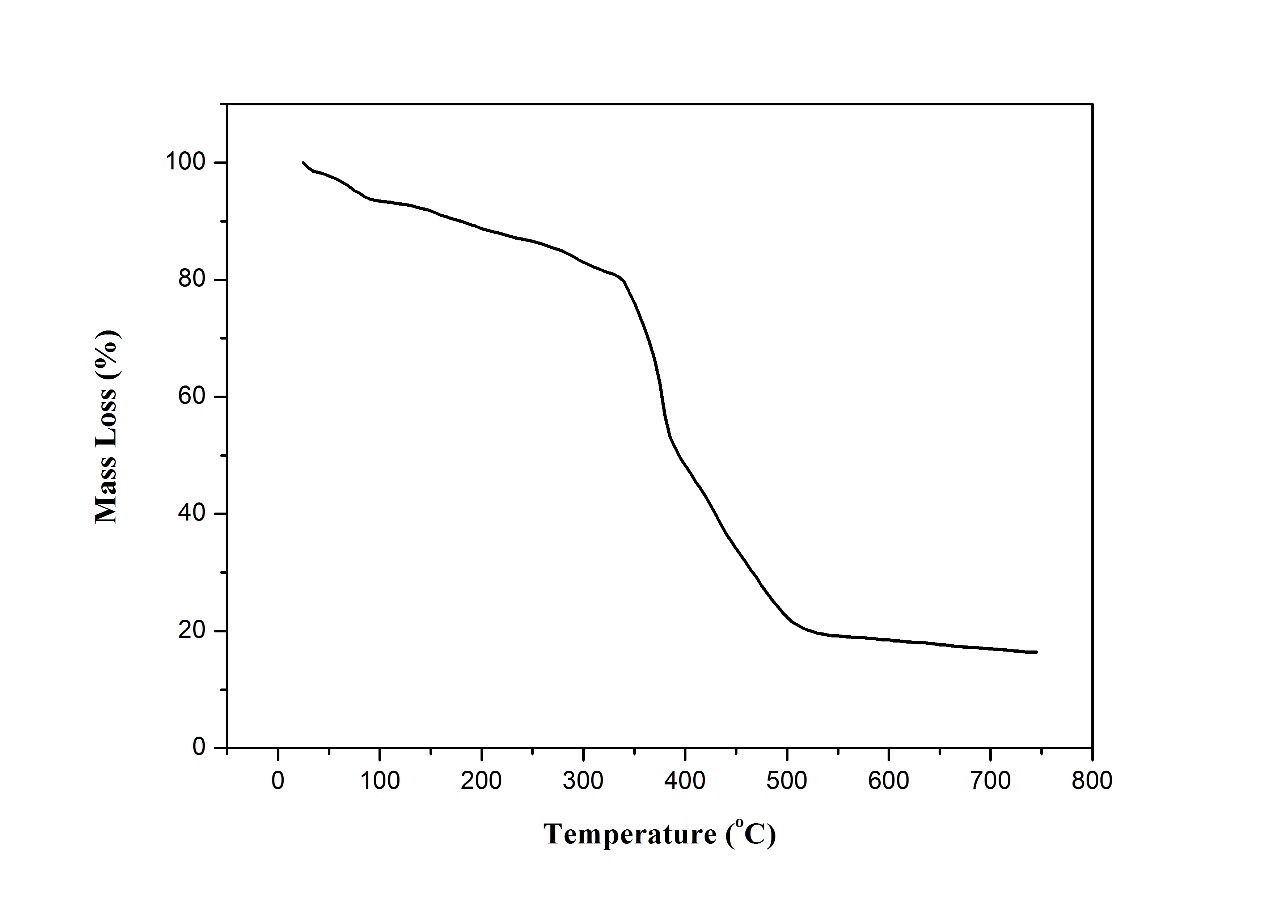


Figure S14. View of TGA in **1**.

| 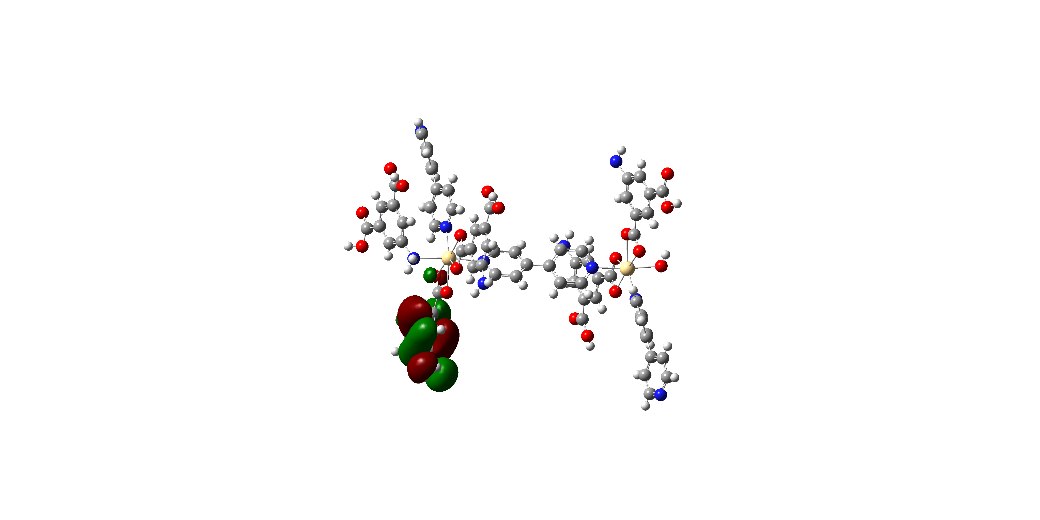  HOMO **1** | 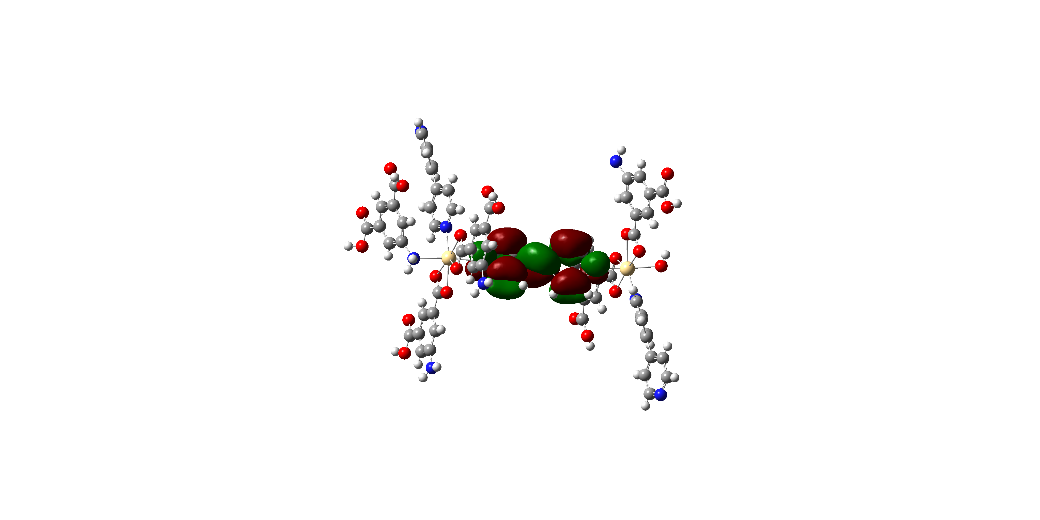  LUMO **1** |
| --- | --- |
| 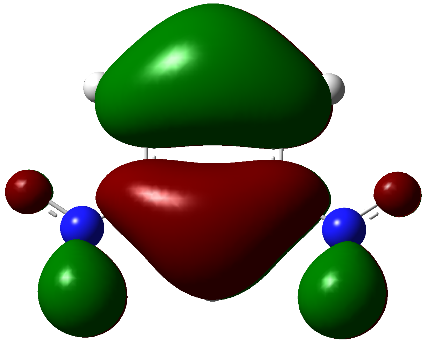  HOMO 1,3-DNB | 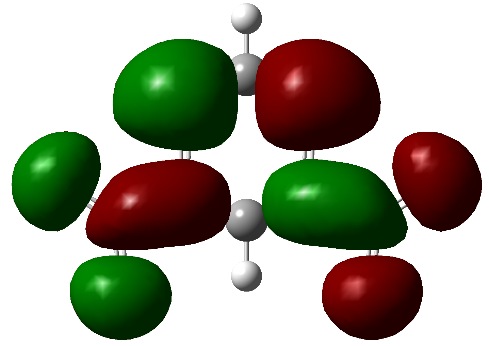  LUMO 1,3-DNB |
| 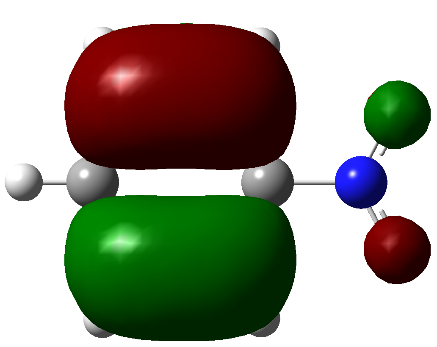  HOMO NB | 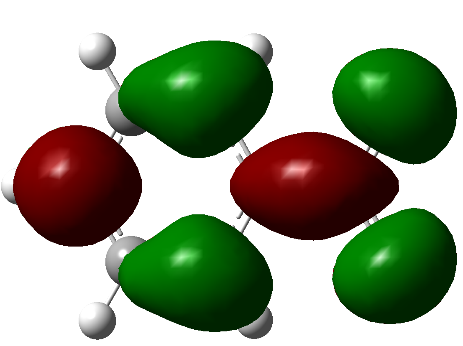  LUMO NB |
| 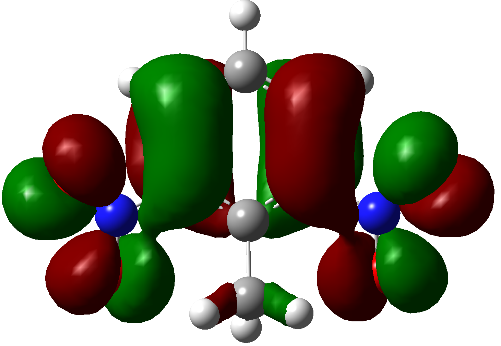  HOMO 2,6-DNT | 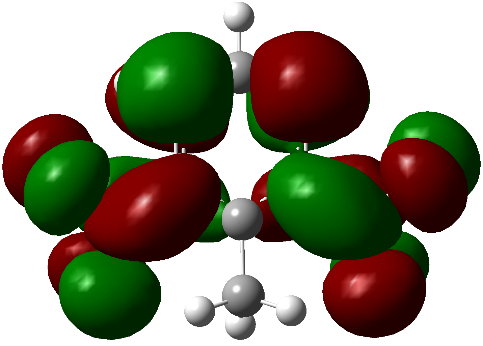  LUMO 2,6-DNT |
| 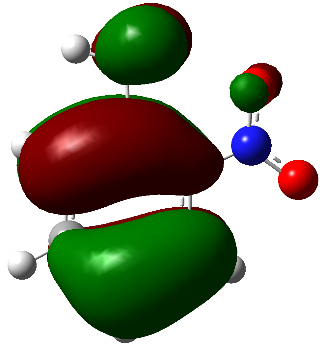  HOMO 2-NT | 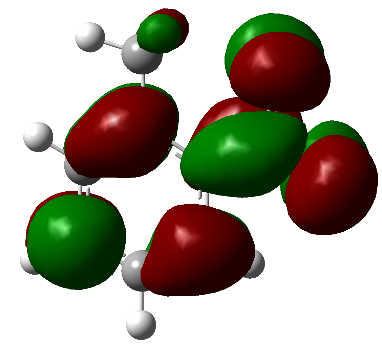  LUMO 2-NT |
| 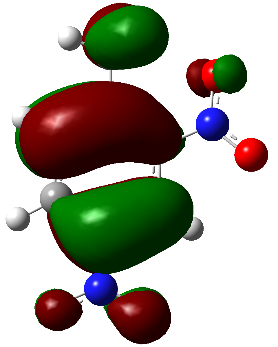  HOMO 2,4-DNT | 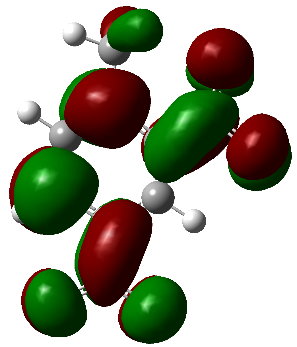  LUMO 2,4-DNT |
| 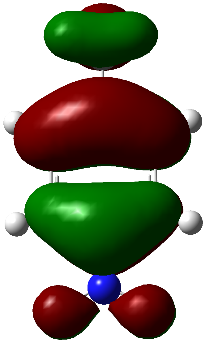  HOMO 4-NT | 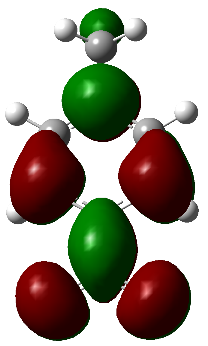  LUMO 4-NT |
| 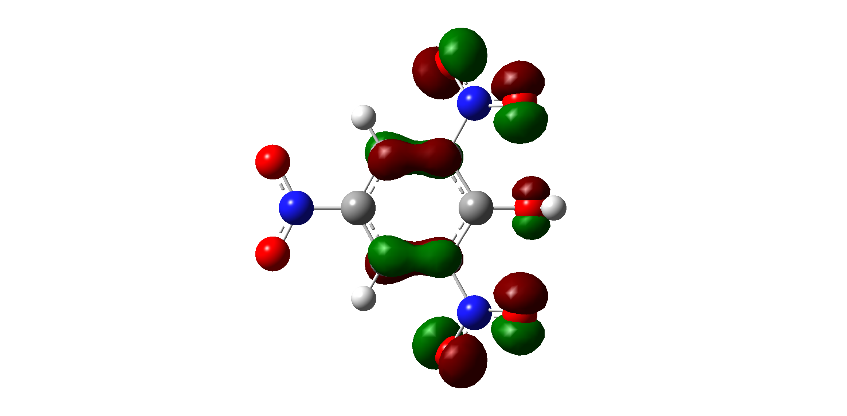  HOMO TNP | 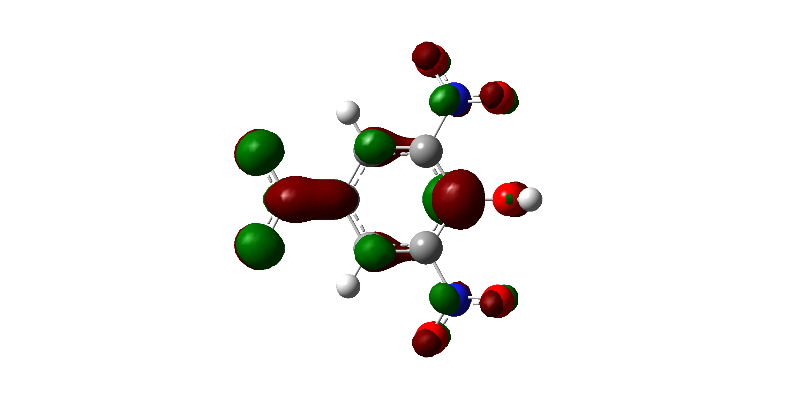  LUMO TNP |
| 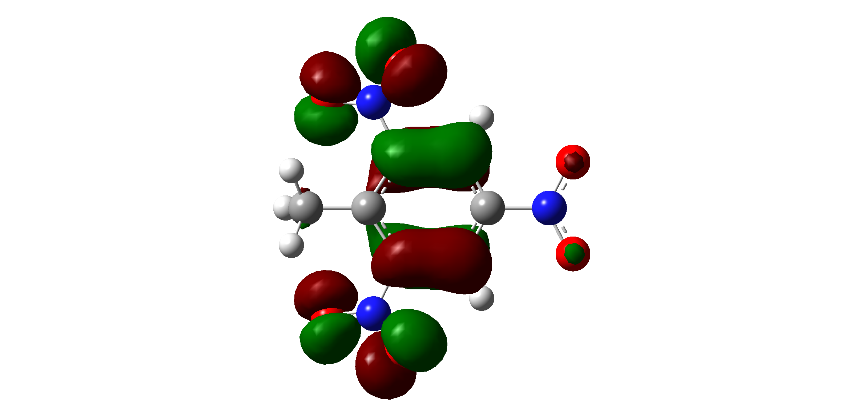  HOMO TNT | 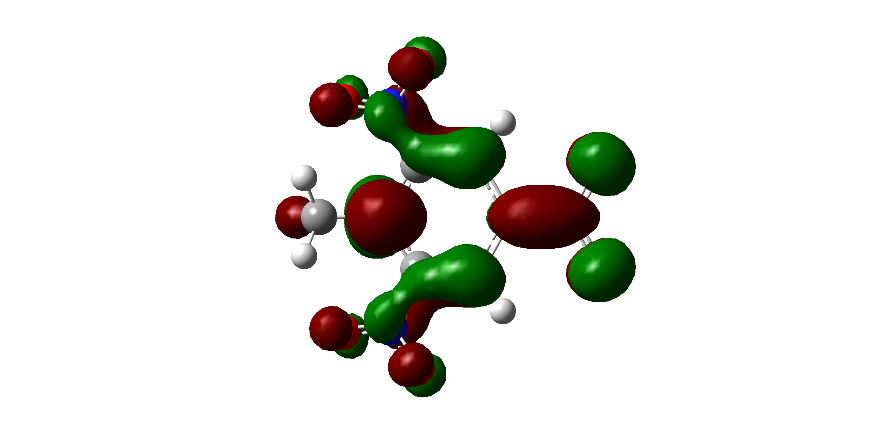  LUMO TNT |

Figure S15. HOMO–LUMO energies of the NACs along with **1**.


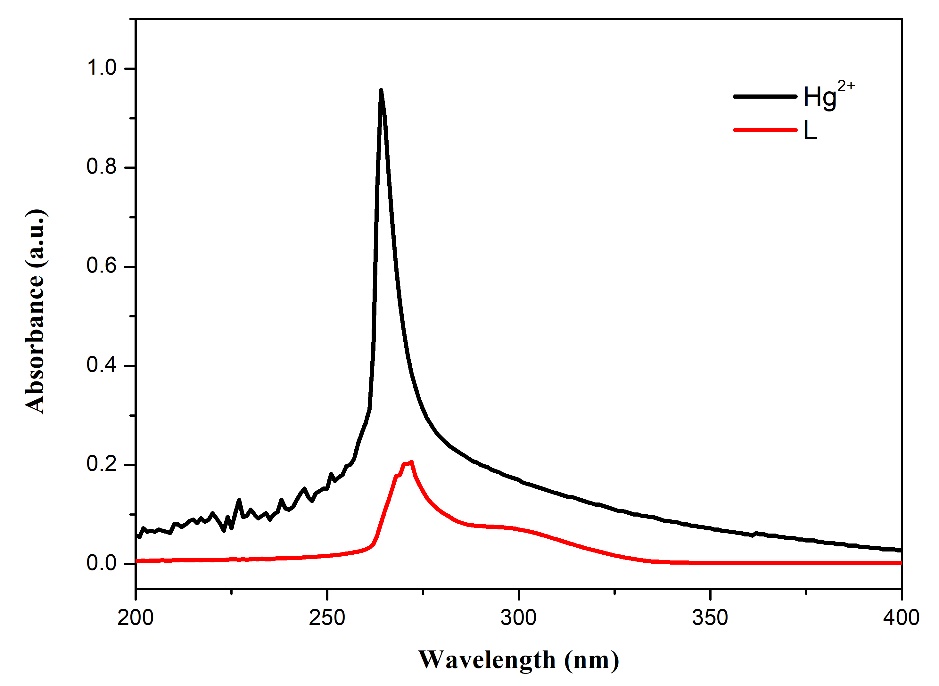


Figure S16. View of UV-vis spectra of H2L and Hg2+.


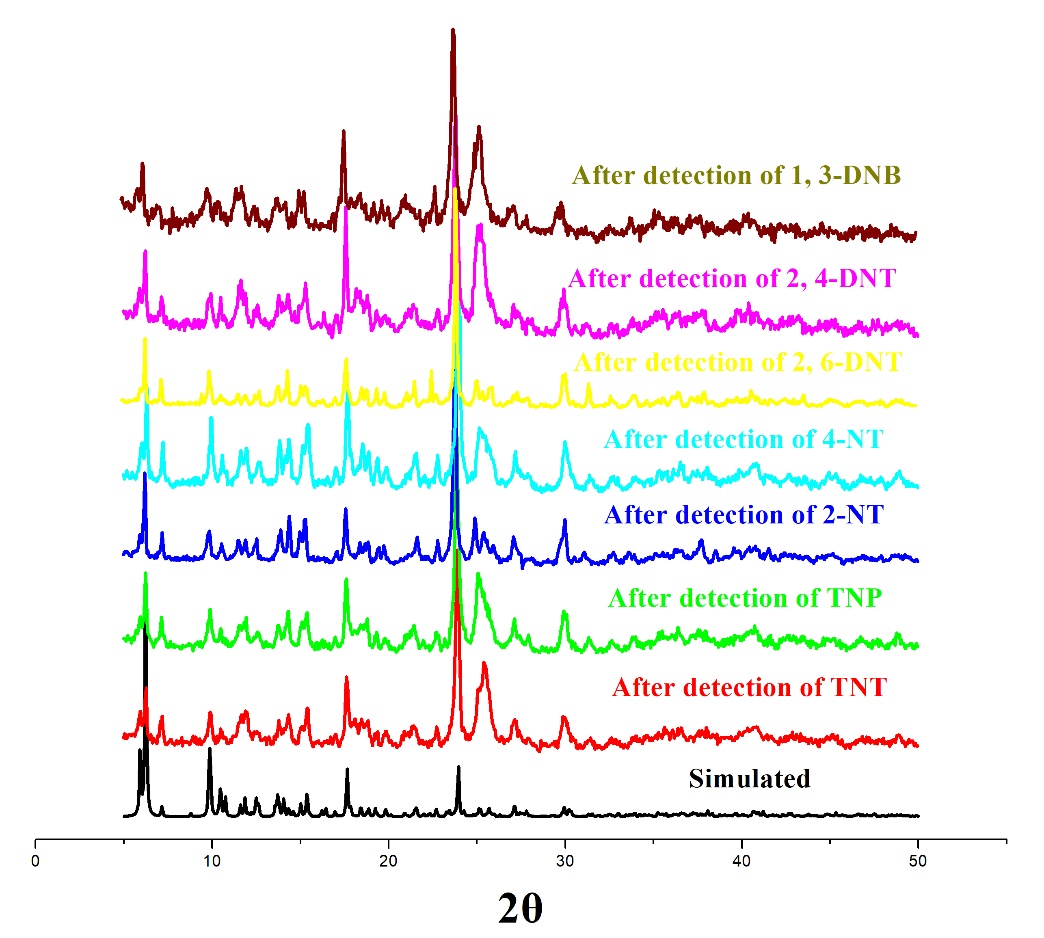


Figure S17. View of the PXRD pattern of **1** after detection of different explosives.

Table S1. LOD and Ksv values of **1** for analytes.

| **Analytes** | **LOD** | **Ksv(M-1)** |
| --- | --- | --- |
| Hg2+ | 6.16×10-8 mol/L | 8.19×105 |
| TNT | 5.68×10-7 mol/L | 8.89×104 |
| TNP | 1.31×10-5 mol/L | 3.85×103 |
| 4-NT | 2.40×10-6 mol/L | 2.01×104 |
| 2-NT | 2.64×10-5 mol/L | 1.91×103 |
| 2,6-DNT | 1.86×10-6 mol/L | 2.72×104 |
| 1,3-DNB | 6.88×10-6 mol/L | 7.34×103 |

Table S2. Comparison of the detective sensitivity in various Hg2+ sensors.

| **Material** | **Sensitivity** | **Reference** |
| --- | --- | --- |
| Et4N[Co(L)2] | 1×10-5 M | 1 |
| Zn2(dbtdcO2)2(tppe) | 3.33×10-9 M | 2 |
| PCN-224 | 6×10-9 M | 3 |
| {[Cd1.5(C18H10O10)]·(H3O)(H2O)3}n | 2×10-9 M | 4 |
| COF-LZU8 | 25×10-9 M | 5 |
| [Cd(2NH2bdc)(tib)·4H2O·0.5DMA]*n* | 4×10-8 M | 6 |
| ZIF-60 | 3×10-9 M | 7 |
| 2,9-DMP | 40×10-9 M | 8 |
| **1** | 6.16×10-8 M | This work |

**References**

[1] A. Mishra, J.H. Jo, H. Kim, S. Woo, K.W. Chi. *ChemPlusChem*, **79**, 925 (2014).

[2] N.D. Rudd, H. Wang, E.M.A. Fuentes-Fernandez, S.J. Teat, F. Chen, G. Hall, Y.J. Chabal, J. Li. *ACS Appl. Mater. Interfaces*, **8**, 30294 (2016).

[3] J. Yang, Z. Wang, Y. Li, Q. Zhuang, W. Zhao, J. Gu. *RSC Adv.*, **6**, 69807 (2016).

[4] P.Y. Wu, Y.H. Liu, Y. Liu, J.R. Wang, Y. Li, W. Liu, J. Wang. *Inorg. Chem.*, **54**, 11046 (2015).

[5] S.Y. Ding, M. Dong, Y.W. Wang, Y.T. Chen, H.Z. Wang, C.Y. Su, W. Wang. *J. Am. Chem. Soc.,* **138**, 3031 (2016).

[6] L.L. Wen, X.F. Zheng, K.L. Lv, C.G. Wang, X.Y. Xu. *Inorg. Chem.*, **54**, 7133 (2015).

[7] F. Xu, L. Kou, J. Jia, X. Hou, Z. Long, S. Wang. *Anal. Chim. Acta*, **804**, 240 (2013).

[8] F.S. Shan, J.P. Lai, H. Sun, P. Zhang, C. Luo, Y.H. He, H.R. Feng. *RSC Adv.*, **6**, 66215 (2016).
